# Supplementary material
Source: PubMed Central journal article supplement (PMC6294887)
Supplement: pnas.1816189115.sapp.pdf [file pnas.1816189115.sapp.pdf]

**Table S1. Sequences of A, B, and C domains for constructing the ICK scaffold library**

| No | Domain_A   | link1 | Domain_B         | link2 | Domain_C                  |
|----|------------|-------|------------------|-------|---------------------------|
| 1  | AACLGMFES  | C     | ADSDDCCETFH      | C     | ALGICMPR                  |
| 2  | ACGQFWWK   | C     | AWFSGESCCTGI     | C     | ATTGRFRYLCKYQI            |
| 3  | ACKGVFDA   | C     | DEERKCCEGLV      | C     | DRRDQWCKWNPW              |
| 4  | ACREWLG    | C     | DENDPRCCSGLV     | C     | ELWCKYNL                  |
| 5  | ADCGWLFHS  | C     | DGKSTFCCSGFN     | C     | ERSSPWCKIDIW              |
| 6  | CAAEGIP    | C     | DGKSTFCCSGYN     | C     | HLWCKYK                   |
| 7  | CGGWMAK    | C     | DPDNDKCEGYK      | C     | HSLFSYCAWDLTFSD           |
| 8  | CIGEGVP    | C     | DPKNDKCKNYT      | C     | HSNYEWCIWDGTFSK           |
| 9  | CMGYDIH    | C     | DPKNDKCCPNRV     | C     | HSNYEWCVWDGT              |
| 10 | DCAGYMRE   | C     | DPNNDKCCPNRE     | C     | HSRWDWCIWDGTF             |
| 11 | DCGTIWHY   | C     | DPNNDKCCPNRV     | C     | HSYWEWCLWDGSF             |
| 12 | DCLGFLWK   | C     | DPNPVKDLPPCCSGLA | C     | ICSGXNWK                  |
| 13 | DCLGLFWI   | C     | DSARKCCEGLV      | C     | ISTKVNYYCRPDRGP           |
| 14 | DCLGWFKG   | C     | DSERKCCEDMV      | C     | KAFVLHCYRN                |
| 15 | DCLGWFKS   | C     | DSERKCCEGMV      | C     | KDVLYYCAWDGTF             |
| 16 | DCRALYGG   | C     | DSERKCCEGYV      | C     | KEKWPITYKICVWDRTF         |
| 17 | DCRKMFGG   | C     | DSKRACCEGLR      | C     | KELSIWDSRCL               |
| 18 | DCTRMFGA   | C     | DSKRKCCEDMV      | C     | KFRDKYCAWDFTF             |
| 19 | DCVRFWVK   | C     | DSNADCCEGYV      | C     | KGPSPKQKKCTRP             |
| 20 | DDCGGLFSG  | C     | DSTLDCCCKHLS     | C     | KGRFVNTWPTFCLV            |
| 21 | DDCGKLFSG  | C     | DTNADCCEGYV      | C     | KIGLYLCIWS                |
| 22 | DDCGTLFSG  | C     | DTSKDCCEGYV      | C     | KLWCRKIIG                 |
| 23 | DDCLGMFSS  | C     | DYNNGCCSGYV      | C     | KLWCRYERTW                |
| 24 | DDDCGWIMDD | C     | EKDEHCCEHLG      | C     | KMGLDYCAWDGTF             |
| 25 | DGECGGFWWK | C     | EKSDCCCEHLG      | C     | KMGLYYCAWDGTF             |
| 26 | ECGKFMWK   | C     | ESNADCCENWA      | C     | KPTLKYCAWDGT              |
| 27 | ECGTLFSG   | C     | FRDKECKGLT       | C     | KPTLKYCAWDGTF             |
| 28 | ECKGFGKS   | C     | GAGKPTCCSGYD     | C     | KPTSKYCAWDGTI             |
| 29 | ECKKLFSG   | C     | GEGKPPCCANFA     | C     | KQKWPFYCAWDWSF            |
| 30 | ECKWYLG    | C     | GRGKPPCCGYA      | C     | KRRGTNAEKRCR              |
| 31 | ECKYLWGT   | C     | GSGKPACCPKYV     | C     | KRRGTNIEKRCR              |
| 32 | ECLEIFKA   | C     | GTDQSECCEGWK     | C     | KRTFNYCAWDGSFSK           |
| 33 | ECLGFGKG   | C     | HPGQPPCCSGLA     | C     | KSKWPRNICVWDGSV           |
| 34 | ECRKMFGG   | C     | KADNDCCGKK       | C     | KTTGIVKLCRW               |
| 35 | ECRWLFGG   | C     | KAHEDCCEHLR      | C     | <b>KWVFFTSKFMCRRVWGKD</b> |
| 36 | ECRWYLG    | C     | KEDECCCEHLQ      | C     | LKPTLHGIWYKHHYCYTQ        |

|    |               |   |                   |   |                   |
|----|---------------|---|-------------------|---|-------------------|
| 37 | ECRYFWGE      | C | KEKLCCSGYV        | C | LKPTLHGIWYKSYCYKK |
| 38 | ECRYLFGG      | C | KENKDCSSKK        | C | NGNTVYRCA         |
| 39 | ECRYWLGG      | C | KKDKCECGWNI       | C | NKKHGWCWGDGTF     |
| 40 | ECRYWLGT      | C | KNKKECCGWNA       | C | NKKYWHCGWGDGTF    |
| 41 | ECTKFLGG      | C | KNSNDCCCKDLV      | C | NRKHKWCKYKLV      |
| 42 | ECTKLLGG      | C | KSDENCCCKFK       | C | NRRDKWCKYKLV      |
| 43 | EDCIPKWKG     | C | KSTSDCCEHLS       | C | NSRDKWCKVLL       |
| 44 | EGECGGFWWK    | C | KTTADCCCKHLA      | C | QLWCKKRL          |
| 45 | GACRWFLLGG    | C | KTTADCCCKHLG      | C | QPAIKWCIWSP       |
| 46 | GCANAYKS      | C | KTTSDCCCKHLG      | C | QSRIANMWPTFCLV    |
| 47 | GCGGLMAG      | C | NALSGPRCCSGLK     | C | QSRIANMWPTFCSQ    |
| 48 | GCGGLMDG      | C | NDEMVCCEHLV       | C | RKKWPYHCGWGDGTF   |
| 49 | GCGTMWSP      | C | NGPHTCCWGYNGYKKA  | C | RKKWPYHCVWDWTV    |
| 50 | GCIPSFGE      | C | NPDNDKCEGRK       | C | RLWCKKII          |
| 51 | GCKGFGDS      | C | NPNDKCCRPKLK      | C | RLWCKKKIEEG       |
| 52 | GCKLTFWK      | C | NPSNDKCCRPNLV     | C | RLWCKKKIEW        |
| 53 | GCLEFWWK      | C | NPSNDQCCKSANLV    | C | RLWCKKKLV         |
| 54 | GCLGDK        | C | NPSNDQCCKSSKLV    | C | RLWCKKRL          |
| 55 | GCMRNKKNK     | C | NPSNDQCCKSSNLV    | C | RLWCKLDW          |
| 56 | GCQKFFWT      | C | NSDADCCRYGER      | C | RLWCKRIINM        |
| 57 | GDCLPHLKL     | C | NSDKECCKGLR       | C | RLWCKYKL          |
| 58 | GDCLPHLKR     | C | NYMDDKCCPGYK      | C | RRAKPSWCWGDFTF    |
| 59 | GGCLPHNRF     | C | PKKAPCCGRLE       | C | RRAKPSWCWGDFTV    |
| 60 | GVDKAGCRYMFGG | C | PYHESCCSGS        | C | RRTLPTYCAWDLTFP   |
| 61 | GVDKEGCRKLLGG | C | PYNEHCCSGS        | C | RSDGKYCAWGDGTF    |
| 62 | IACAPRFSI     | C | PYNENCCSKS        | C | RSDWKYCAWGDGTF    |
| 63 | IACAPRFSL     | C | PYNENCCSQS        | C | RSRDQWCKYKLV      |
| 64 | IACAPRGLL     | C | PYNESCCSGS        | C | RVRDQWCKYKLV      |
| 65 | KCLPPGKP      | C | PYSKYCCSGS        | C | SDKHKWCKWKL       |
| 66 | LCSREGEF      | C | QPNTQPCCNNAEEETIN | C | SHNKCT            |
| 67 | QCGEFMWK      | C | RENKDCSSKK        | C | SKLFKLCNFSF       |
| 68 | RCIEEGKW      | C | RRDSDCCPHLG       | C | SKTGFVKNICKYEM    |
| 69 | SAVCIPSGQP    | C | SAGQTCCKHLV       | C | SKTWGCAVEAP       |
| 70 | SCKLTFWR      | C | SESECCPHLG        | C | SPKHGVCVWDWTFRK   |
| 71 | SECRWFMGG     | C | SKDADCCAHLA       | C | SPKWGLCNFPMP      |
| 72 | SEKDCIKHLQR   | C | SKHEDCCAHLA       | C | SPRWGVCVWDWTFRK   |
| 73 | SFCIPFKP      | C | SKTGDCSSHLS       | C | SPTWKVCVLDKSPGRR  |
| 74 | SPTCIPSGQP    | C | SQDGDCCCKHLQ      | C | SPTWKVCVYARP      |
| 75 | SPTCIPTGQP    | C | SQTSDCCPHLA       | C | SQHRLCSVKA        |
| 76 | SPTCIRSGQP    | C | SSDKPCCSGYY       | C | SRKDKWCKYQI       |
| 77 | SPVCTPSGQP    | C | SSTSDCCCKHLS      | C | SRKHRWCKYEI       |

|     |                   |   |                 |   |                   |
|-----|-------------------|---|-----------------|---|-------------------|
| 78  | <b>SSTCIPSGQP</b> | C | STEKPCDNFS      | C | SRKTRWCKYQI       |
| 79  | SSTCIRTDQP        | C | STHADCCGFI      | C | SRQLCKYVIDW       |
| 80  | STCTPTDQP         | C | SVDSDCCAHLG     | C | SRRDRWCKYDL       |
| 81  | SVCIPSGQP         | C | SVHSDCCAHLG     | C | SRRDRWCKYYL       |
| 82  | TCRYLFGG          | C | SVNDDCCPRLG     | C | SRRGTNPEKRCR      |
| 83  | TCYDIGEL          | C | TDRLPCCFGL      | C | SRRHGWCVWDGTF     |
| 84  | VCRGYGLP          | C | TIDDDCCPHLG     | C | SRTWKWCVLAPW      |
| 85  | YCQKWLWT          | C | TKDEDCKHLA      | C | SSKHKWCCKVYL      |
| 86  | YCQKMMWT          | C | TKDSECCPHLG     | C | SSRWKWCVLASPF     |
| 87  | CKQADEP           | C | TPEKNDCCQRLY    | C | SSRWKWCVLPAPW     |
| 88  | ACRKKWEY          | C | TPGKNECCPNRV    | C | TFKENENGNTVKRCD   |
| 89  | DDDCEPPGNF        | C | TPGKNECCPNYA    | C | TFKTNENGNTVKRCD   |
| 90  | VKPCRKEGQL        | C | TSDSDCCPNWV     | C | TGLCIPP           |
| 91  | WCKQSGEM          | C | TTSSECCAHLG     | C | TRFNVC GK         |
| 92  | CLSGGEV           | C | VNRHGDCCEGLE    | C | TWPTEICID         |
| 93  | GKPCHEEGQL        | C | VPKNECCSGYA     | C | TYKANENGNQVKRCD   |
| 94  | CIPFLHP           | C | YGATQKIPCCGV    | C | TYKENENGNTVKRCD   |
| 95  | ACSKKWEY          | C | YKLRKCCAGFY     | C | TYKENENGNTVQRCD   |
| 96  |                   | C | DVFSLDCCGTI     | C | TYKTNENGNSVQRCD   |
| 97  |                   | C | IVPIIGFIYCCPGLI | C | VKTSGYWYKKTTCRRKS |
| 98  |                   | C | GMIKIGPPCCSGW   | C | WKRRRSFEVCVPTPKT  |
| 99  |                   | C | DPIFQNCRCGW     | C | LGVCMW            |
| 100 |                   | C | NVLDQNCDDGY     | C | FFACA             |
| 101 |                   | C | DFLFPKCCNY      | C | VLFCV             |
| 102 |                   | C | DPFLQNCCLGWN    | C | IVFVCT            |
| 103 |                   | C | TFFFPDCCNSI     | C | ILLFCS            |
| 104 |                   | C | IVPILGFVYCCPGLI | C | VFVCI             |
| 105 |                   | C |                 | C | AQFICL            |
| 106 |                   | C |                 | C | GPFVCV            |

The public database UniProt ([www.uniprot.org](http://www.uniprot.org)) was evaluated for sequences homologous to ProTx-II and bearing the same predicted pattern of disulfide bridges, as described in *Materials and Methods*. This table lists the unique domains in the 110 parent sequences. Domains A (95), B (104), and C (106) segments were joined at the 2<sup>nd</sup> and 5<sup>th</sup> Cys residues. In bold are three segments from parental toxin Omega-AcTx-Hv1b, JZTX21 and Neurotoxin Hm2, that forms novel toxin C6.

**Table S2. Stoichiometry of hHv1 and  $\Delta$ hHv1 channels formed with TFP encoded subunits.**

| Ananalysis                                    | Subunits expressed |                   |
|-----------------------------------------------|--------------------|-------------------|
|                                               | hHv1-TFP           | $\Delta$ hHv1-TFP |
| Determined subunits stoichiometry in channels | 2                  | 1                 |
| Particles studied ( <i>N</i> )                | 114                | 112               |
| Particles with                                |                    |                   |
| One step                                      | 11                 | 100               |
| Two steps                                     | 100                | 9                 |
| Three steps                                   | 1                  | 2                 |
| Four steps                                    | 2                  | 1                 |
| Confidence                                    | 0.999              | NA                |
| $\theta$                                      | 0.95               | NA                |
| $\theta + 1$                                  | 0.63               | NA                |

TFP-tagged hHv1 or  $\Delta$ hHv1 subunits were expressed in HEK293T cells and studied by smTIRF (*Materials and Methods*). The number of photobleaching steps observed for TFP fluorophore in each single fluorescent spot reports on the stoichiometry of channels. WT hHv1-TFP channels are dimers and  $\Delta$ hHv1-TFP channels are monomeric. Analysis was performed according to methods described by Hines. The statistical confidence in the null hypotheses that hHv1 forms dimers was assessed to be greater than 0.999. Prebleaching and variance in quantum efficiency reduce the probability of observing each possible bleaching event ( $\theta$ ).  $\theta$  is calculated from the value of *n* and the distribution of the photobleaching data per Hines.  $\theta$  is decreased when the distribution is altered to estimate the possibility that higher numbers of missed bleaching steps, for example  $\theta + 1$ , indicating that this stoichiometry is less likely. NA indicates not applicable.

**Table S3. Analysis of single molecule photobleaching for smTIRF experiments with  $\Delta$ hHv1 and C6.**

| Analysis                                                                       | Subunits expressed and fluorescence labeled C6 peptide applied |                         |                       |                        |                         |                            |
|--------------------------------------------------------------------------------|----------------------------------------------------------------|-------------------------|-----------------------|------------------------|-------------------------|----------------------------|
|                                                                                | $\Delta$ Hv1-TFP (monomer)                                     |                         |                       |                        |                         |                            |
|                                                                                | With 0.01 nM<br>TAMRA-C6                                       | With 0.1 nM<br>TAMRA-C6 | With 1 nM<br>TAMRA-C6 | With 10 nM<br>TAMRA-C6 | With 100 nM<br>TAMRA-C6 | With 1 $\mu$ M<br>TAMRA-C6 |
| Manders' coefficient                                                           | 0.08 $\pm$ 0.01                                                | 0.12 $\pm$ 0.01         | 0.50 $\pm$ 0.05       | 0.83 $\pm$ 0.04        | 0.9 $\pm$ 0.06          | 0.93 $\pm$ 0.06            |
| Particles studied                                                              | 50                                                             | 50                      | 112                   | 50                     | 50                      | 100                        |
| Particles with one TFP bleaching steps                                         | 45                                                             | 45                      | 100                   | 47                     | 46                      | 91                         |
| Colocalized particles (N)                                                      | 4                                                              | 6                       | 51                    | 40                     | 41                      | 84                         |
| Particles with (TAMRA bleaching)                                               |                                                                |                         |                       |                        |                         |                            |
| One step (n)                                                                   | 4                                                              | 6                       | 51                    | 40                     | 41                      | 84                         |
| Two steps                                                                      | 0                                                              | 0                       | 0                     | 0                      | 0                       | 0                          |
| Three steps                                                                    | 0                                                              | 0                       | 0                     | 0                      | 0                       | 0                          |
| Four steps                                                                     | 0                                                              | 0                       | 0                     | 0                      | 0                       | 0                          |
| Number of colocalized $\Delta$ hHv1 with one<br>TAMRA bleaching steps (n/N, %) | 4/4<br>(100%)                                                  | 6/6<br>(100%)           | 51/51<br>(100%)       | 40/40<br>(100%)        | 41/41<br>(100%)         | 84/84<br>(100%)            |

$\Delta$ Hv1-TFP was expressed in HEK293T cells and incubated with varying concentrations of TAMRA-C6 toxin for reaching equilibrium. Mean Manders' coefficient for colocalization were determined as described in the *Materials and Methods*. Data were reported and analyzed as in Table 1.

Fig. S1. Binding of TAMRA-C6 to  $\Delta$ Hv1 monomeric channel.

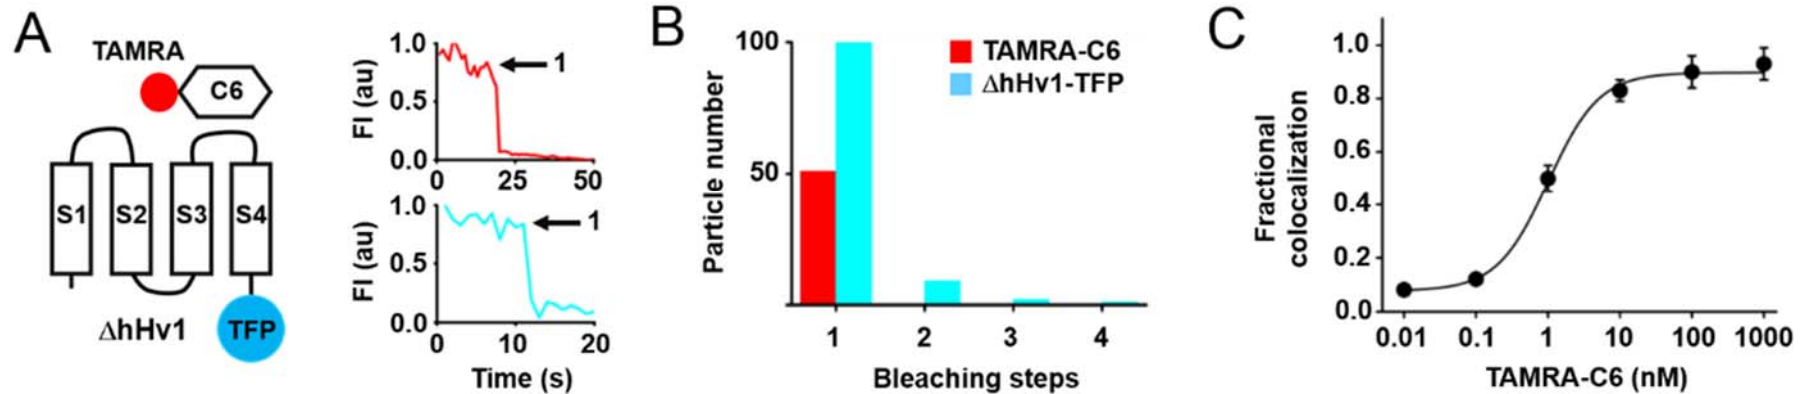

C6 peptide was synthesized and labeled with red fluorophore carboxytetramethylrhodamine (TAMRA-C6). Its interaction with  $\Delta$ hHv1 tagged with teal fluorescent protein ( $\Delta$ hHv1-TFP) was studied in HEK293T cells by smTIRF microscopy as described in *Materials and Methods*.

(A) Cartoon showing one TAMRA-C6 peptide binding on monomeric hHv1 channel ( $\Delta$ hHv1-TFP), which was constructed as described in *Materials and Methods*. Simultaneous photobleaching time course for representative colocalized particles with both  $\Delta$ hHv1-TFP and TAMRA-C6 shows one stepwise change in fluorescence intensity.

(B) Histogram of photobleaching steps for  $\Delta$ hHv1-TFP (teal bars) simultaneously photobleached with 1 nM TAMRA-C6 (red bars). 89% of studied particles with  $\Delta$ Hv1-TFP were bleached in 1 step. Among all colocalized particles containing both fluorescent colors, 100% have one TAMRA-C6 bleaching step (Table S3).

(C) Dose-response for hHv1 titrated with TAMRA-C6 at increasing concentrations. Solid lines correspond to fit Hill relationship, yields  $K_d = 1.08 \pm 0.13$  nM and a Hill coefficient of  $1.02 \pm 0.14$ . Each point represents mean  $\pm$  SEM for 5 cells studied in each condition.

**Fig. S2. C6 does not inhibit rNav1.4 and hKv2.1.**

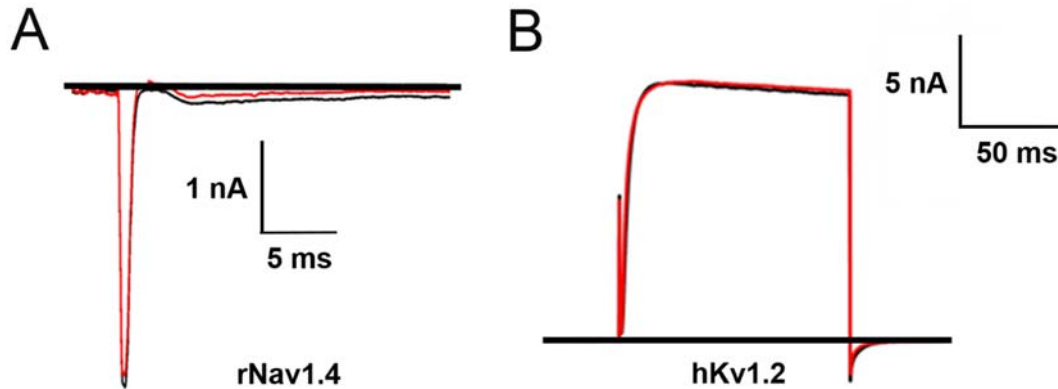

Channels were studied in HEK293T cells using whole cell voltage clamp as described in the *Materials and Methods*.

(A) rNav1.4 was expressed in HEK293T, and studied using 30 ms pulse to 0 mV from a holding voltage of -100 mV with 10 s interval. 1  $\mu$ M C6 (red trace) was applied after control pulses and shows not inhibition comparing to control current before application (black trace).

(B) hKv2.1 was expressed in HEK293T, and studied using 250 ms pulse to 40 mV from a holding voltage of -80 mV with 10 s interval. 1  $\mu$ M C6 (red trace) was applied after control pulses and shows not inhibition comparing to control current before application (black trace).

Fig. S3. The S1-S2 loop of hHv1 is not the major binding epitope for C6.

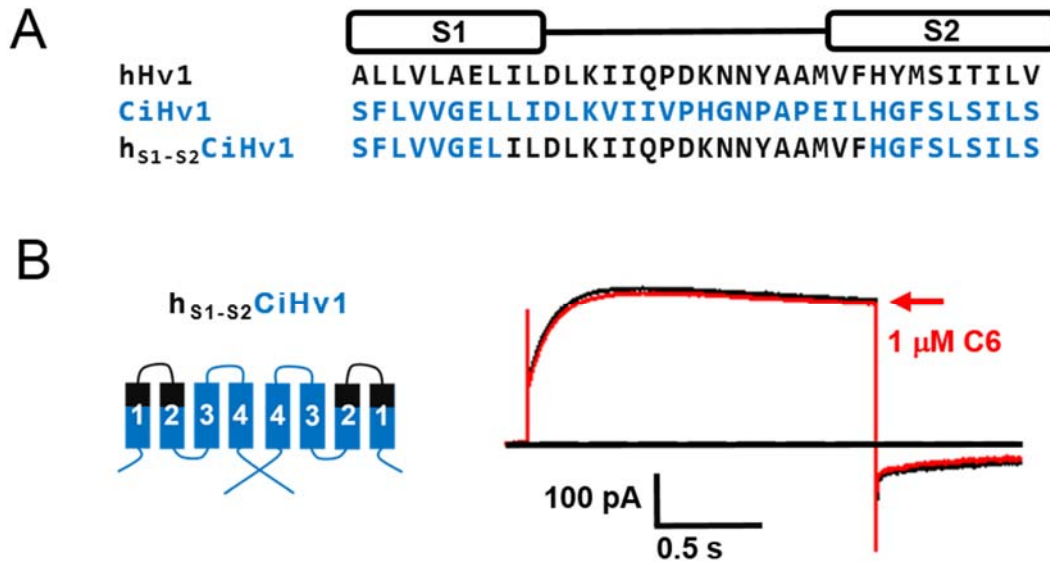

Channels were studied in HEK293T cells using whole cell voltage clamp as described in the *Materials and Methods*.

(A) Sequence alignment of CiHv1 (blue), hHv1 (black) and h<sub>S1-S2</sub>CiHv1 chimera transplanting the S1-S2 loop of hHv1 into CiHv1.

(B) Representative current traces for h<sub>S1-S2</sub>CiHv1 with 1 μM C6 (red) or without C6 (black). C6 does not block CiHv1 (Fig. 4B) or h<sub>S1-S2</sub>CiHv1 at 1 μM.



**Fig. S4. The S3-S4 loop of hHv1 confer C6 inhibition on hKv2.1.**

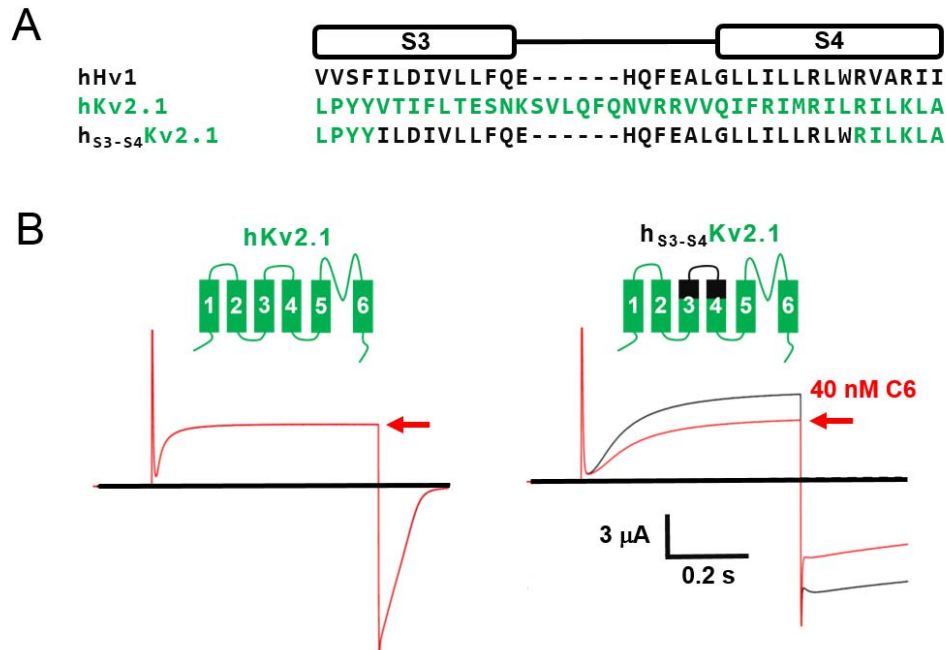

Channels were expressed in *Xenopus* oocytes and studied by TEVC with a holding voltage of -80 mV and 0.5 s steps to 0 mV every 10 s, as described in *Materials and Methods*.

- (A) Sequence alignment of hKv2.1 (green), hHv1 (black) and h<sub>S1-S2</sub>Kv2.1 chimera transplanting the S1-S2 loop of hHv1 into hKv2.1.
- (B) Representative current trace for hKv2.1 and h<sub>S1-S2</sub>Kv2.1 with 40 nM C6 (red) or without C6 application (black).

**Fig. S5. C6 did not suppress the acrosome reaction of capacitated sperm.**

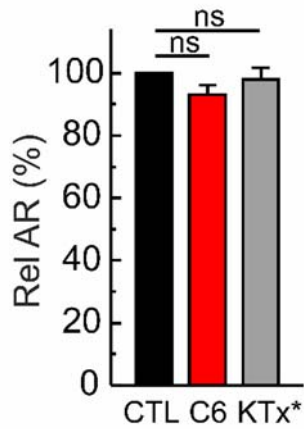

Human spermatozoa were collected and capacitated as described in *Methods and Materials*, and then incubated with or without peptides for 30 min. The acrosome reaction was triggered subsequently by progesterone and measured the same as in Fig. 5C. CTL indicates control with no added peptide.

**Fig. S6. C6 did not affect protein tyrosine phosphorylation in sperm.**

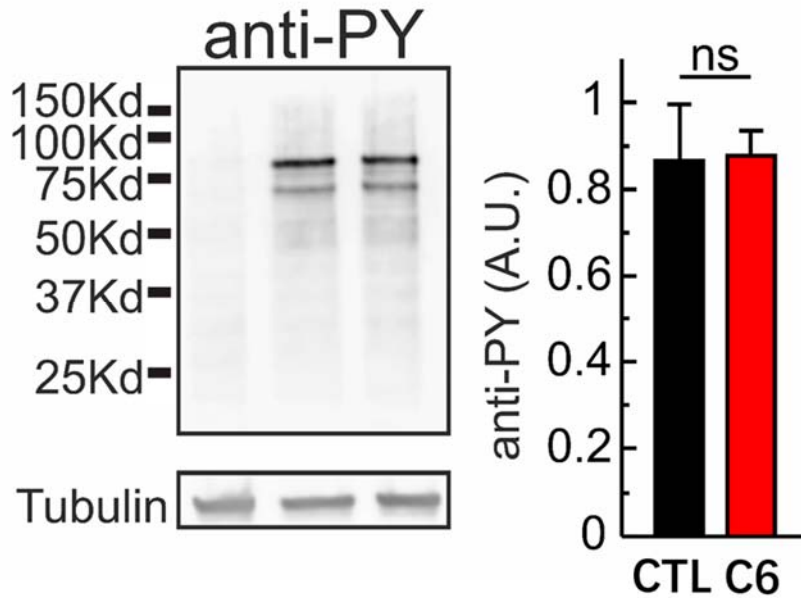

Human sperm were incubated with or without 20  $\mu$ M C6 before lysis. Proteins were extracted and analyzed by Western blot using human monoclonal anti-phosphotyrosine antibodies as probe, as described in *Materials and Methods*. C6 has no effect on the phosphorylation of protein tyrosine kinase.

**Fig. S7. C6 does not inhibit Catsper in human sperm directly.**

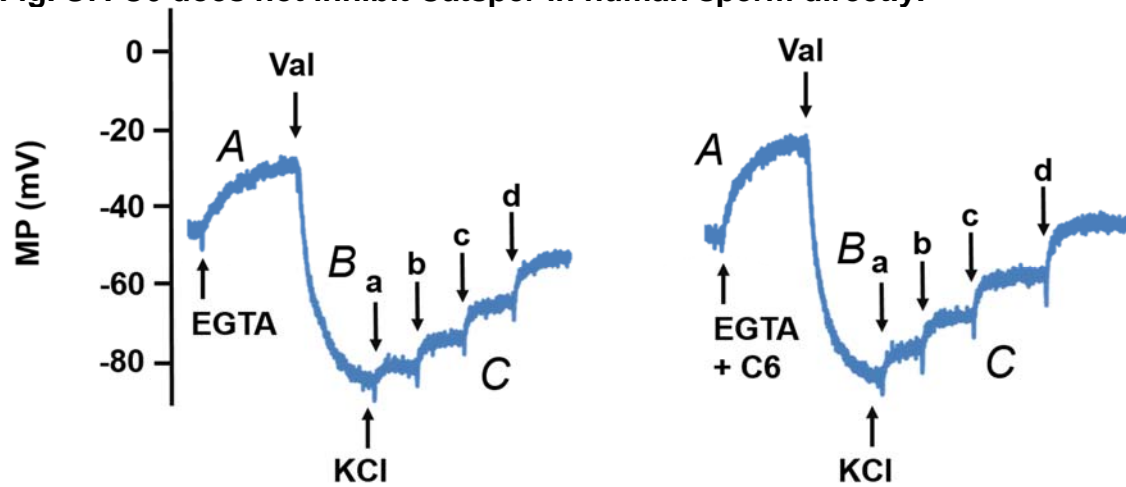

The effect of C6 on CatSper in human sperm was evaluated by measuring changes in membrane potential (MP) in HTF media after adding 3.5 mM EGTA, which chelates external  $\text{Ca}^{2+}$  and allows  $\text{Na}^{+}$  to permeate through  $\text{Ca}^{2+}$  permeable channels, depolarizing the sperm. After adding EGTA, MP rises  $20 \pm 2$  mV (phase A) due to  $\text{Na}^{+}$  influx in control sperm. Similarly, with 20  $\mu\text{M}$  C6, EGTA chelation leads to a rise in the MP of  $22 \pm 3$  mV. Valinomycin decreases MP  $\sim 60$  mV in control sperm due to  $\text{K}^{+}$  efflux and the effect is similar in sperm incubated with C6 (phase B). Four subsequent additions of KCl moves the MP in correspondence with the Nernst potential for potassium distribution across the plasma membrane (phase C). The initial suspension contains 4.7 mM KCl, and the subsequent KCl additions resulted in final concentrations (mM KCl) in the sperm suspension of 1.2 (a), 2.5 (b), 5 (c), and 10 (d), which correspond to MP of -87, -80, -71, -58, and -44 mV.
